# Supplementary material for: Computational Understanding of Delithiation, Overlithiation, and Transport Properties in Disordered Cubic Rock-Salt Type Li2TiS3
Source: MDPI journal article supplement (doi:10.3390/nano13233013), 2023-11-24
Supplement: s1 [file s1]

# Computational Understanding of Delithiation, Overlithiation, and Transport Properties in Disordered Cubic Rock-Salt Type $\text{Li}_2\text{TiS}_3$ . Supplementary Materials

Riccardo Rocca <sup>1,2\*</sup>, Mauro Francesco Sgroi <sup>1</sup>, Maddalena D'Amore <sup>1</sup>, Nello Li Pira <sup>2</sup> and Anna Maria Ferrari <sup>1,\*</sup>

<sup>1</sup> Department of Chemistry and NIS, University of Turin, 10125 Torino, Italy;  
maurofrancesco.sgroi@unito.it (M.F.S.); maddalena.damore@unito.it (M.D.)

<sup>2</sup> Centro Ricerche FIAT S.C.p.A, 10043 Orbassano, Italy

\* Correspondence: riccardo.rocca@unito.it or riccardo.rocca@external.crf.it (R.R.);  
anna.ferrari@unito.it (A.M.F.)

**Table S1.** Number of possible configurations based on the number of Lithium atoms removed from the structure. Calculated with CRYSTAL code.

| Delithiation (%) | Li atoms removed | Configurations |
|------------------|------------------|----------------|
| 100              | 18               | 1              |
| 94.44            | 17               | 18             |
| 88.89            | 16               | 153            |
| 83.33            | 15               | 816            |
| 77.78            | 14               | 3060           |
| 72.22            | 13               | 8568           |
| 66.67            | 12               | 18564          |
| 61.11            | 11               | 31824          |
| 55.56            | 10               | 43758          |
| 50               | 9                | 48620          |
| 44.44            | 8                | 43758          |
| 38.89            | 7                | 31824          |
| 33.33            | 6                | 18564          |
| 27.78            | 5                | 8568           |
| 22.22            | 4                | 3060           |
| 16.67            | 3                | 816            |
| 11.11            | 2                | 153            |
| 5.56             | 1                | 18             |
| 0                | 0                | 1              |

**Table S2.** Relative stability of three configurations each delithiation state. The most stable structure is considered for the energy-delta calculation.

| x | Relative stability (eV) | x  | Relative stability (eV) |
|---|-------------------------|----|-------------------------|
| 2 | 0.000                   | 9  | 0.000                   |
|   | 0.080                   |    | 1.111                   |
|   | 0.142                   |    | 3.538                   |
| 3 | 0.000                   | 10 | 0.000                   |
|   | 1.274                   |    | 0.078                   |
|   | 1.561                   |    | 0.210                   |
| 4 | 0.000                   | 11 | 0.000                   |
|   | 0.135                   |    | 2.791                   |
|   | 1.229                   |    | 3.630                   |
| 5 | 0.000                   | 12 | 0.000                   |
|   | 1.940                   |    | 0.215                   |
|   | 2.285                   |    | 1.594                   |
| 6 | 0.000                   | 13 | 0.000                   |
|   | 0.173                   |    | 1.181                   |
|   | 0.883                   |    | 2.653                   |
| 7 | 0.000                   | 14 | 0.000                   |
|   | 1.100                   |    | 0.119                   |

|   |       |    |       |
|---|-------|----|-------|
|   | 1.503 |    | 0.154 |
| 8 | 0.000 | 15 | 0.000 |
|   | 0.218 |    | 1.803 |
|   | 0.939 |    | 3.102 |

**Table S3.** Reaction energy for the most stable structure for each delithiation state, x is the number of Li atoms removed. Also reported the required energy for a single lithium extraction.

| x  | $\Delta E_{\text{Reaction}}$ (eV) | $\Delta E_{\text{Li removal}}$ (eV) |
|----|-----------------------------------|-------------------------------------|
| 1  | 4.18                              | 4.18                                |
| 2  | 6.31                              | 2.14                                |
| 3  | 10.22                             | 3.90                                |
| 4  | 12.63                             | 2.41                                |
| 5  | 16.29                             | 3.66                                |
| 6  | 18.30                             | 2.01                                |
| 7  | 22.18                             | 3.00                                |
| 8  | 24.35                             | 2.17                                |
| 9  | 27.21                             | 2.86                                |
| 10 | 30.33                             | 3.12                                |
| 11 | 32.75                             | 2.42                                |
| 12 | 34.87                             | 2.12                                |
| 13 | 37.80                             | 2.93                                |
| 14 | 41.34                             | 3.54                                |
| 15 | 43.93                             | 2.60                                |

**Table S4.** Band gap evolution as a function of delithiation for structures with even vacancies.

| x  | Band Gap (eV) |
|----|---------------|
| 0  | 2.46          |
| 2  | 2.35          |
| 4  | 2.39          |
| 6  | 2.31          |
| 8  | 2.23          |
| 10 | 2.13          |
| 12 | 2.27          |
| 14 | 2.15          |

**Table S5.** State of charge and open circuit voltage for the LTS system.

| SOC (%) | OCV (V) |
|---------|---------|
| 0       |         |
| 5.88    | 1.42    |
| 11.76   | 1.51    |
| 17.64   | 2.43    |
| 23.52   | 2.33    |

|       |      |
|-------|------|
| 29.41 | 2.64 |
| 35.29 | 2.61 |
| 41.17 | 2.83 |
| 47.05 | 2.77 |
| 52.94 | 2.80 |
| 58.82 | 2.73 |
| 64.70 | 2.74 |
| 70.58 | 2.78 |
| 76.47 | 2.75 |
| 82.35 | 2.70 |
| 88.23 | 2.72 |
| 94.11 | 2.77 |
| 100   | 2.76 |

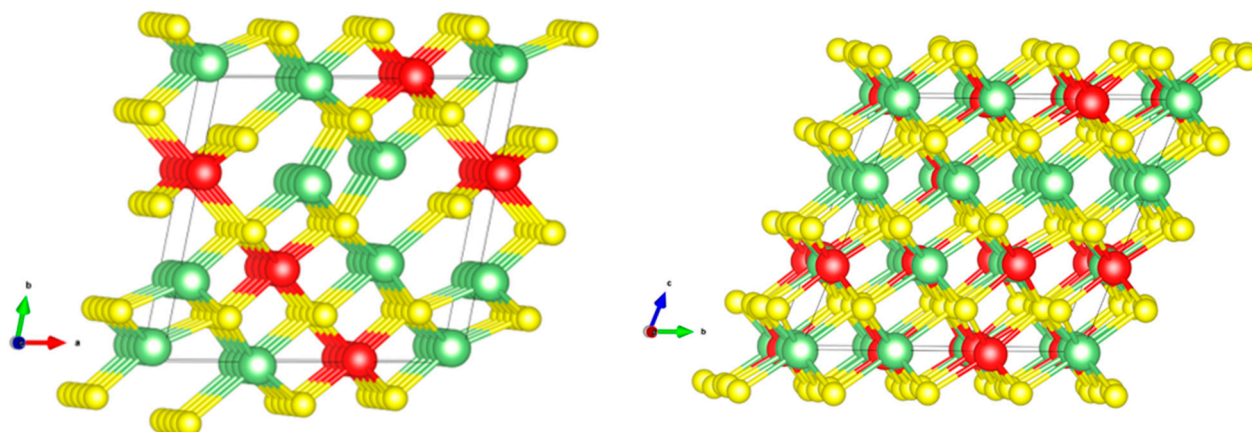

**Figure S1.** An example of ordered (left) and dispersed (right) structures.

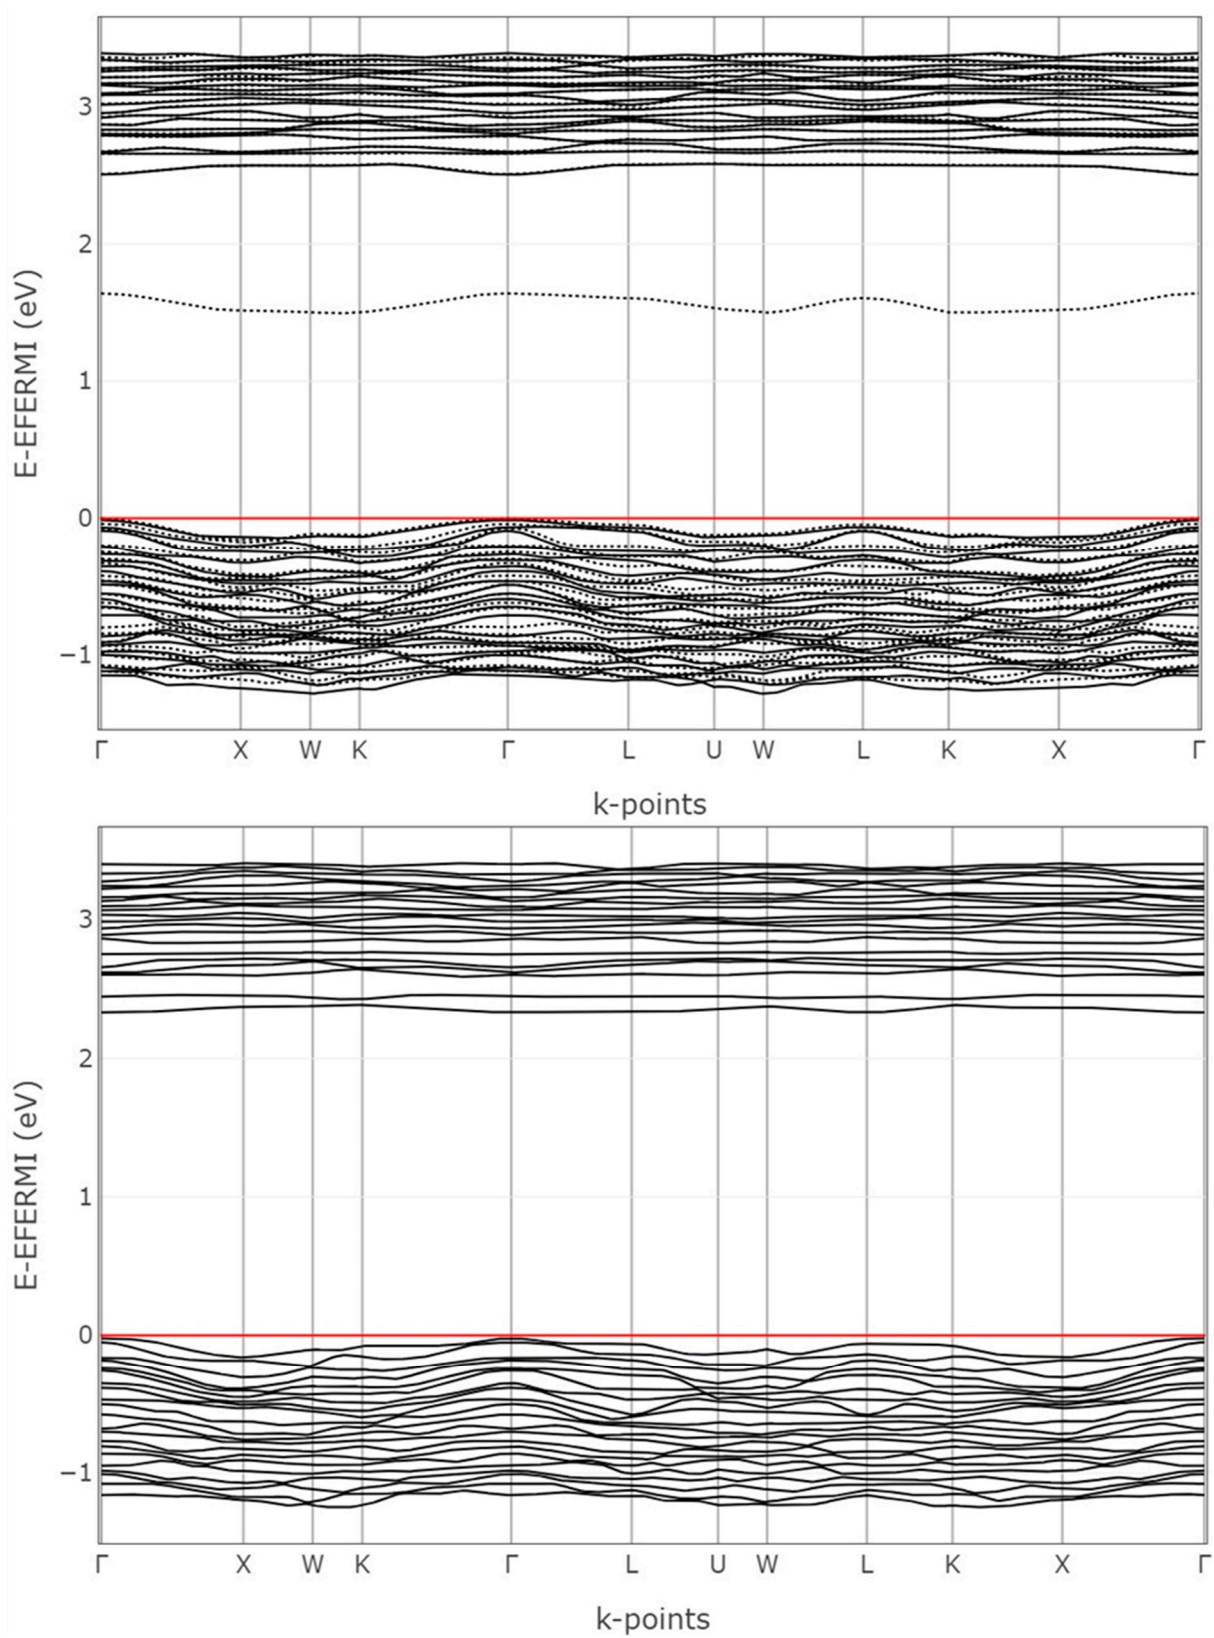

**Figure S2.** Band structure for mono-delithiated (top) and double-delithiated (bottom) structures.

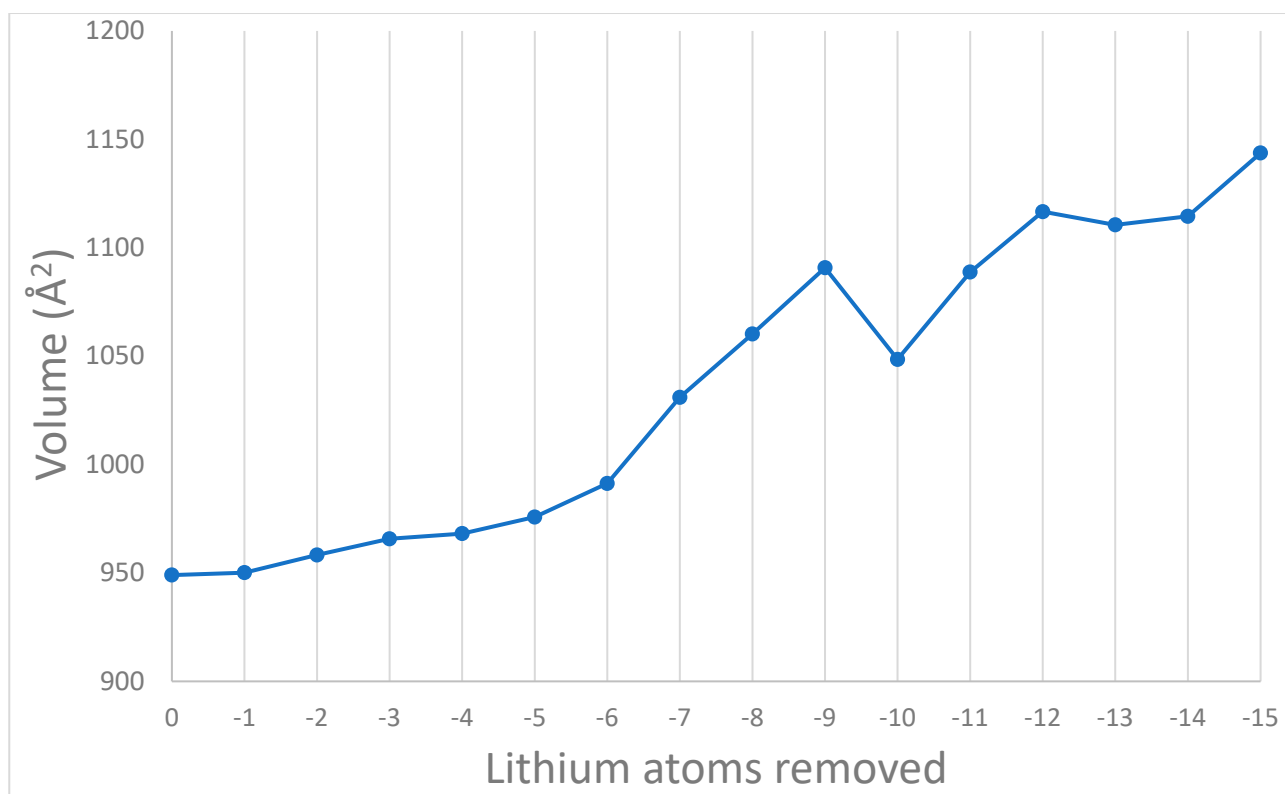

**Figure S3.** Volume variation during delithiation expressed in Å².

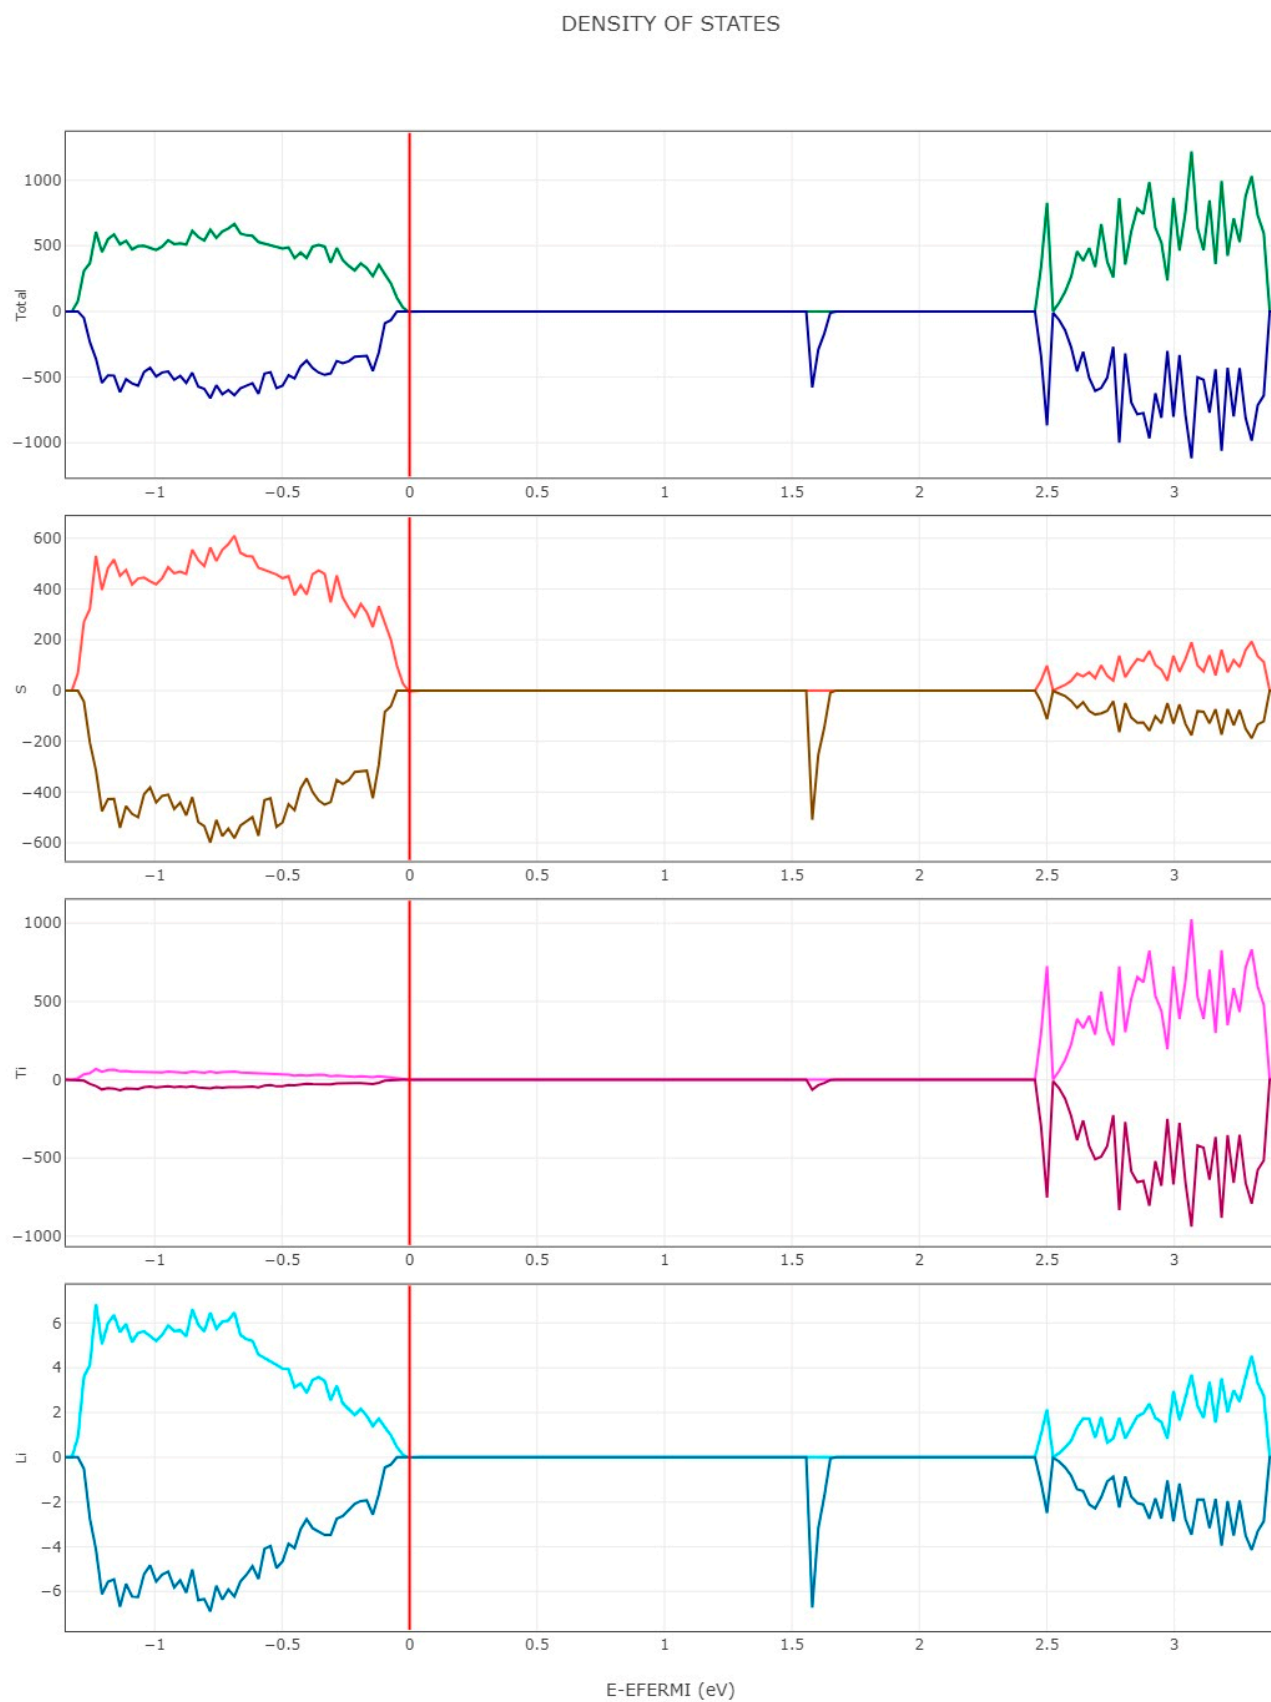

**Figure S4.** Density of states for mono-delithiated structure. Total DOS (top) and projections on atoms, from top to bottom: S, Ti, Li.
